1 **The psychological distress and coping styles in the early stages of the**  
2 **2019 coronavirus disease (COVID-19) epidemic in the general mainland**  
3 **Chinese population: a web-based survey**

4

5

6 Hui-yao Wang<sup>1¶</sup>, Qian Xia<sup>1¶</sup>, Zhen-zhen Xiong<sup>2</sup>, Zhi-xiong Li<sup>3</sup>, Wei-yi Xiang<sup>4</sup>, Yi-wen  
7 Yuan<sup>1</sup>, Ya-ya Liu<sup>1,5</sup>, Zhe Li<sup>1\*</sup>

8

9

10

11 <sup>1</sup> The Mental Health Center and National Clinical Research Center for Geriatrics, West  
12 China Hospital, Sichuan University, Chengdu, Sichuan, China

13

14 <sup>2</sup> School of Nursing, Chengdu Medical College, Chengdu, Sichuan, China

15

16 <sup>3</sup> The Third Department of Clinical Psychology, Karamay Municipal People's Hospital,  
17 Karamay, Xinjiang, China

18

19 <sup>4</sup> The West China College of Medicine, Sichuan University, Chengdu, Sichuan, China

20

21 <sup>5</sup> Zun Yi Psychiatric Hospital, Zunyi, Guizhou, China

22

23 \* **Corresponding author**

24 E-mail: jay\_li@163.com (ZL).

25

26 ¶ These authors contributed equally to this work.

27

28

29

30

31

32

33

34

35

36

37

38

39

40

41

42

43

44

45 **Abstract**

46 **Background**

47 As the epidemic outbreak of 2019 coronavirus disease (COVID-19), general  
48 population may experience psychological distress. Evidence has suggested  
49 that negative coping styles may be related to subsequent mental illness.  
50 Therefore, we investigate the general population's psychological distress and  
51 coping styles in the early stages of the COVID-19 outbreak.

52

53 **Methods**

54 A cross-sectional battery of surveys was conducted from February 1-4, 2020.  
55 The Kessler 6 psychological distress scale, the simplified coping style  
56 questionnaire and a general information questionnaire were administered  
57 on-line to a convenience sample of 1599 in China. Spearman's correlation  
58 was used to measure the correlations among category variables.

59

60 **Results**

61 General population's psychological distress were significant differences  
62 based on age, marriage, epidemic contact characteristics, concern with media  
63 reports, and perceived impacts of the epidemic outbreak (all  $p < 0.001$ ) except  
64 gender ( $p=0.316$ ). Those with a history of visiting Wuhan and a history of  
65 epidemics occurring in the community, more concern with media reports,  
66 perceived more severe impacts and negative coping style had a higher level

67 of psychological distress, which was significantly positively correlated with  
68 a history of visiting Wuhan ( $r=0.548$ ,  $p<0.001$ ), a history of epidemics  
69 occurring in the community ( $r=0.219$ ,  $p<0.001$ ), and concern with media  
70 reports ( $r=0.192$ ,  $p<0.001$ ). Coping styles were significantly different across  
71 all category variables (all  $p <0.001$ ), and negatively correlated with other  
72 category variables (all  $p<0.01$ ) except age and marriage. Psychological  
73 distress was significantly negatively correlated with the coping style  
74 ( $r=-0.573$ ,  $p<0.01$ ).

75

## 76 **Conclusions**

77 In the early stages of COVID-19, general population with epidemic contact  
78 characteristics, excessive concern with media reports, and perceived more  
79 severe impacts have higher levels of psychological distress. Psychological  
80 distress was significantly negatively correlated with the coping style.  
81 Interventions should be implemented early, especially for those population  
82 with a high level of psychological distress and/or with a negative coping  
83 style.

84

85

86

87

88

89

90

## 91 **Introduction**

92 The epidemic of the 2019 coronavirus disease (COVID-19) has aroused  
93 widespread concern throughout society in China. Because the virus can be  
94 transmitted through droplets, contact, etc. [1], cities in many regions of  
95 China have closed non-essential public places, restricted mass gathering  
96 activities, and enacted other control measures to effectively control the  
97 spread of the virus [2]. The epidemic has had a strong impact on general  
98 population's daily life. At the same time, as the epidemic continues, general  
99 population gradually experience different levels of psychological distress,  
100 such as nervousness, fear of infection, anxiety, depression, sleep problems,  
101 and inattention [3,4]. Previous studies have reported that some psychological  
102 problems often occur during similar epidemic [5,6] or other traumatic stress  
103 events, such as natural disasters [7,8], disease [9], or long-term employment  
104 in high stress occupations [10-12], and may last for a long time [13,14].

105 When faced with stress or traumatic experiences, general population often  
106 responds differently, with some responding positively and others responding  
107 negatively. Evidence has suggested that coping styles in the face of stress  
108 have an impact on the quality of general population's life [15,16], and  
109 negative coping styles may be related to psychological distress or mental  
110 illness such as post-traumatic stress disorder (PTSD), anxiety, and depression

111 [7,8,12]. For this reason, we conducted this study in the early stages of this  
112 epidemic to investigate the general population's psychological distress and  
113 coping style related to the epidemic of COVID-19 so that those who have  
114 high levels of psychological distress and/or respond negatively can be  
115 detected early and undergo timely intervention.

116

## 117 **Methods**

118 This study was conducted through an online survey, starting at 16:00 on  
119 February 1, 2020 and ending at 24:00 on February 4, and the survey was  
120 approved by the ethical review board of the West China Hospital of Sichuan  
121 University. The snowball sampling method was used to invite subjects. All  
122 invitees completed the questionnaire online via Questionnaire Star  
123 (<https://www.wjx.cn>). An initial set of invitees (10 participants) was chosen  
124 to ensure broad representation of age, gender, occupation, education level,  
125 and city. This set of invitees then forwarded the questionnaire to 10  
126 companions whom they considered suitable for the survey, and this second  
127 set forwarded the questionnaire in the same way. The study included a  
128 general population aged 18 years or older who volunteered to participate in  
129 the study, and respondents were excluded if they reported a history of mental  
130 illness and/or could not complete the online survey independently.

131

## 132 **Data collection**

133 A self-made questionnaire was used to collect demographic and  
134 epidemiological information of participants, including gender, age, marriage,  
135 epidemic contact and concern characteristics, and perceived epidemic  
136 impacts of the epidemic of COVID-19.

137

### 138 **Psychological distress assessment**

139 The Kessler 6 psychological distress Scale (K6) was used to assess the  
140 psychological distress of participants; this scale has been proven to have  
141 cross-cultural reliability and validity [17]. It contains six questions that ask  
142 participants to rate how often they have felt ‘nervous’, ‘hopeless’, ‘restless or  
143 fidgety’, ‘so depressed that nothing could cheer you up’, ‘that everything was  
144 an effort’, and ‘worthless’ during the past 30 days.

145

### 146 **Coping style assessment**

147 The Simplified Coping Style Questionnaire (SCSQ) was used to assess the  
148 participants’ coping styles during the COVID-19 epidemic; this  
149 questionnaire has been proven to have good reliability and validity in  
150 Chinese [18]. The SCSQ contains twenty items, with each item using a  
151 four-point score (0□=□never, 1□=□seldom, 2□=□often, 3□=□always),  
152 and two subscales: positive coping (12 items) and negative coping (8 items).  
153 According to the average and standard deviation of the positive coping style  
154 and the negative coping style scores, a Z conversion is used to calculate their

155 respective standard scores, and then, the negative coping standard scores are  
156 subtracted from the positive coping style standard scores to calculate the  
157 tendency value of coping style. A result greater than 0 was defined as a  
158 participant adopting a positive coping style when faced with stress, and a  
159 result less than 0 was defined as a participant adopting a negative coping  
160 style [19].

161

## 162 **Statistical analysis**

163 Differences in psychological distress (K6 score) among categorical variables  
164 were tested by t-tests or one-way analysis of variance, and differences in  
165 coping styles were tested by chi-squared tests. Correlations among all  
166 categorical variables were measured by Spearman's correlation. All statistical  
167 analyses were conducted in SPSS version 22.0 (IBM, Chicago, IL, USA),  
168 and  $p < 0.05$  was considered to be statistically significant.

169

## 170 **Quality control**

171 The same IP address could be used only once to complete the questionnaire,  
172 which did not collect any personal information such as names, thereby  
173 ensuring anonymity and honest responses. The time spent on each  
174 questionnaire was monitored automatically, and the whole questionnaires  
175 completed in fewer than 120 seconds were rejected as invalid.

176

177 **Results**

178 **Sample characteristics**

179 There were 1607 individuals from 26 regions of China who completed this  
180 survey, and 1599 (99.5%) were included in the analysis participants. Among  
181 all participants, 1068 were female (66.8%); ages ranged from 18 to 84 years  
182 old (mean 33.9±12.3 years); 914 were married (57.2%); 326 had a history of  
183 visiting Wuhan (20.4%); and 333 had a history of epidemics occurring in  
184 their community (20.8%) (Table 1).

185

186

**Table1 Sample description**

| <b>Variables</b>                                          | <b>n (%)</b> |
|-----------------------------------------------------------|--------------|
| <b>Total</b>                                              | 1599(100.0)  |
| <b>Demographic characteristics</b>                        |              |
| Gender                                                    |              |
| female                                                    | 1068(66.8)   |
| male                                                      | 531(33.2)    |
| Age (mean 33.9±12.3, years)                               |              |
| 18-30                                                     | 722(45.2)    |
| 31-40                                                     | 471(29.5)    |
| 41-50                                                     | 254(15.9)    |
| >50                                                       | 152(9.5)     |
| Marriage                                                  |              |
| single                                                    | 624(39.0)    |
| married                                                   | 914(57.2)    |
| divorced                                                  | 61(3.8)      |
| <b>Epidemic contact characteristics</b>                   |              |
| History of visiting Wuhan                                 |              |
| no                                                        | 1273(79.6)   |
| yes                                                       | 326(20.4)    |
| History of epidemics occurring in the community           |              |
| no                                                        | 1266(79.2)   |
| yes                                                       | 333(20.8)    |
| <b>Concern with media reports related to the epidemic</b> |              |
| less concerned                                            | 16(1.0)      |

---

|                                          |            |
|------------------------------------------|------------|
| concerned                                | 141(8.8)   |
| more concerned                           | 428(26.8)  |
| extremely concerned                      | 1014(63.4) |
| <b>Perceived impacts of the epidemic</b> |            |
| Changes over living situations           |            |
| feel relax                               | 209(13.1)  |
| no change                                | 479(30.0)  |
| feel nervous                             | 911(56.9)  |
| Emotional control                        |            |
| no difficult                             | 832(52.0)  |
| less difficult                           | 304(19.0)  |
| difficult                                | 70(4.4)    |
| more difficult                           | 70(4.4)    |
| extremely difficult                      | 323(20.2)  |
| Epidemic-related dreams                  |            |
| no                                       | 987(61.7)  |
| less                                     | 151(9.4)   |
| general                                  | 115(7.2)   |
| more                                     | 33(2.1)    |
| extremely large                          | 313(19.6)  |

---

187

## 188 **Comparison of the psychological distress**

189 The results revealed significant differences in the participants' psychological  
190 distress based on age, marriage, epidemic contact characteristics, concern  
191 with media reports related to the epidemic, and perceived impacts of the  
192 epidemic (all  $p < 0.001$ ); there were no significant differences based on  
193 gender ( $p = 0.316$ ). As age increases and marital status changes, K6 scores  
194 have a downward trend. Those with a history of visiting Wuhan and a history  
195 of epidemics occurring in the community have a higher level of  
196 psychological distress than those without such experiences. The  
197 psychological distress tended to increase with concern with media reports  
198 related to the epidemic and perceived impacts of the epidemic. At the same  
199 time, the results also show that those with a negative coping style have a

200 higher level of psychological distress than those with a positive coping style

201 (Table 2).

202

203 **Table2 Psychological distress (K6 scores) of participants (n=1599).**

| Variables                                                 | Means (SD) | 95%CI       | t/F*    | p      |
|-----------------------------------------------------------|------------|-------------|---------|--------|
| <b>Total</b>                                              | 7.7(7.7)   | 7.36,8.11   |         |        |
| <b>Demographic characteristics</b>                        |            |             |         |        |
| Gender                                                    |            |             | -1.002  | 0.316  |
| female                                                    | 7.6(7.5)   | 7.15,8.05   |         |        |
| male                                                      | 8.0(8.1)   | 7.32,8.69   |         |        |
| Age category (mean33.9±12.3, years)                       |            |             | 102.04  | <0.001 |
| 18-30                                                     | 11.1(8.9)  | 10.47,11.76 |         |        |
| 31-40                                                     | 5.2(5.3)   | 4.77,5.73   |         |        |
| 41-50                                                     | 4.8(4.7)   | 4.22,5.36   |         |        |
| >50                                                       | 4.3(4.8)   | 3.55,5.08   |         |        |
| Marriage                                                  |            |             | 141.73  | <0.001 |
| single                                                    | 11.5(9.0)  | 10.75,12.17 |         |        |
| married                                                   | 5.4(5.4)   | 5.01,5.72   |         |        |
| divorced                                                  | 5.2(6.0)   | 3.68,6.68   |         |        |
| <b>Epidemic contact characteristics</b>                   |            |             |         |        |
| History of visiting Wuhan                                 |            |             | -40.86  | <0.001 |
| no                                                        | 5.0(4.8)   | 4.70,5.23   |         |        |
| yes                                                       | 18.6(7.1)  | 17.80,19.34 |         |        |
| History of epidemics occurring in the community           |            |             | -10.25  | <0.001 |
| no                                                        | 6.8(7.0)   | 6.37,7.14   |         |        |
| yes                                                       | 11.5(8.8)  | 10.50,12.40 |         |        |
| <b>Concern with media reports related to the epidemic</b> |            |             |         |        |
|                                                           |            |             | 21.84   | <0.001 |
| less concerned                                            | 2.4(2.6)   | 1.10,3.65   |         |        |
| concerned                                                 | 4.0(3.9)   | 3.34,4.62   |         |        |
| more concerned                                            | 6.9(7.3)   | 6.19,7.58   |         |        |
| extremely concerned                                       | 8.7(8.0)   | 8.21,9.20   |         |        |
| <b>Perceived impacts of the epidemic</b>                  |            |             |         |        |
| Changes over living situations                            |            |             | 331.71  | <0.001 |
| feel relax                                                | 2.4(2.8)   | 2.01,2.78   |         |        |
| no change                                                 | 3.2(3.0)   | 2.94,3.47   |         |        |
| feel nervous                                              | 11.3(8.2)  | 10.81,11.87 |         |        |
| Emotional control                                         |            |             | 1863.07 | <0.001 |
| no difficult                                              | 3.0(2.8)   | 2.84,3.22   |         |        |
| less difficult                                            | 5.6(3.5)   | 5.23,6.01   |         |        |

|                                |           |             |         |        |
|--------------------------------|-----------|-------------|---------|--------|
| difficult                      | 8.9(3.9)  | 7.97,9.80   |         |        |
| more difficult                 | 10.3(5.1) | 9.11,11.49  |         |        |
| extremely difficult            | 21.0(3.3) | 20.68,21.39 |         |        |
| <b>Epidemic-related dreams</b> |           |             | 1642.78 | <0.001 |
| no                             | 3.6(3.4)  | 3.38,3.80   |         |        |
| less                           | 6.2(3.8)  | 5.62,6.83   |         |        |
| general                        | 7.4(4.5)  | 6.54,8.18   |         |        |
| more                           | 10.7(4.6) | 9.13,12.27  |         |        |
| extremely large                | 21.4(2.6) | 21.06,21.65 |         |        |
| <b>Coping style</b>            |           |             | 37.41   | <0.001 |
| negative                       | 15.0(8.3) | 14.31,15.70 |         |        |
| positive                       | 4.0(3.5)  | 3.75,4.17   |         |        |

204 Note: \* representing the differences of K6 scores among categorical variables by t-test or one-way  
 205 analysis of variance

206

## 207 **Comparison of the coping style**

208 The ratios of the coping styles are 34.2% negative and 65.8% positive. The  
 209 comparison found that the coping style was significantly different across all  
 210 category groups (all  $p < 0.001$ ) (Table 3). Compared with the positive coping  
 211 style, the negative coping style occurred more in those between 18 and 30  
 212 years old, single people, those with a history of visiting Wuhan, those with a  
 213 history of epidemics occurring in the community, those who reported that  
 214 perceived emotional control was extremely difficult and those who reported  
 215 having many epidemic-related dreams (Table 3).

216

217 **Table3 Coping style of participants (n=1599).**

| Variables                          | Coping Style |              | X <sup>2</sup> | p     |
|------------------------------------|--------------|--------------|----------------|-------|
|                                    | Negative (%) | Positive (%) |                |       |
| <b>Total</b>                       | 547(34.2)    | 1052(65.8)   |                |       |
| <b>Demographic characteristics</b> |              |              |                |       |
| Gender                             |              |              | 6.83           | 0.009 |
| female                             | 342(32.0)    | 726(68.0)    |                |       |
| male                               | 205(38.6)    | 326(61.4)    |                |       |

|                                                           |            |            |        |        |
|-----------------------------------------------------------|------------|------------|--------|--------|
| Age (mean 33.9±12.3, years)                               |            |            | 180.89 | <0.001 |
| 18-30                                                     | 373(51.7)  | 349(48.3)  |        |        |
| 31-40                                                     | 105(22.3)  | 366(77.7)  |        |        |
| 41-50                                                     | 43(16.9)   | 211(83.1)  |        |        |
| >50                                                       | 26(17.1)   | 126(82.9)  |        |        |
| Marriage                                                  |            |            | 172.73 |        |
| single                                                    | 335(53.7)  | 289(46.3)  |        |        |
| married                                                   | 197(21.6)  | 717(78.5)  |        |        |
| divorced                                                  | 15(24.6)   | 46(75.4)   |        |        |
| <b>Epidemic contact characteristics</b>                   |            |            |        |        |
| History of visiting Wuhan                                 |            |            | 440.89 | <0.001 |
| no                                                        | 275(21.6)  | 998(78.4)  |        |        |
| yes                                                       | 272(83.4)  | 54(16.6)   |        |        |
| History of epidemics occurring in the community           |            |            | 56.86  | <0.001 |
| no                                                        | 375(29.6)  | 891(70.4)  |        |        |
| yes                                                       | 172(51.7)  | 161(48.4)  |        |        |
| <b>Concern with media reports related to the epidemic</b> |            |            |        |        |
|                                                           |            |            | 13.98  | 0.003  |
| less concerned                                            | 4(25.0)    | 12(75.0)   |        |        |
| concerned                                                 | 32(22.7)   | 109(77.3)  |        |        |
| more concerned                                            | 135(31.5)  | 293(68.5)  |        |        |
| extremely concerned                                       | 376(37.1)  | 638(62.9)  |        |        |
| <b>Perceived impacts of the epidemic</b>                  |            |            |        |        |
| Changes over living situations                            |            |            | 172.61 | <0.001 |
| feel relax                                                | 36(17.2)   | 173(82.8)  |        |        |
| no change                                                 | 76(15.9)   | 403(84.1)  |        |        |
| feel nervous                                              | 435(47.8)  | 476(52.3)  |        |        |
| Emotional control                                         |            |            | 715.31 | <0.001 |
| no difficult                                              | 118(14.2)  | 714(85.8)  |        |        |
| less difficult                                            | 68(22.4)   | 236(77.6)  |        |        |
| difficult                                                 | 27(38.6)   | 43(61.4)   |        |        |
| more difficult                                            | 24(34.3)   | 46(65.7)   |        |        |
| extremely difficult                                       | 310(96.0)  | 13(4.0)    |        |        |
| Epidemic-related dreams                                   |            |            | 711.68 | <0.001 |
| no                                                        | 166(16.82) | 821(83.18) |        |        |
| less                                                      | 39(25.83)  | 112(74.17) |        |        |
| general                                                   | 22(19.13)  | 93(80.87)  |        |        |
| more                                                      | 14(42.42)  | 19(57.58)  |        |        |
| extremely large                                           | 306(97.76) | 7(2.24)    |        |        |

218

## 219 Correlation analysis

220 The correlation analysis found that psychological distress was significantly

221 positively correlated with a history of visiting Wuhan ( $r=0.548$ ,  $p<0.001$ ), a  
222 history of epidemics occurring in the community ( $r=0.219$ ,  $p<0.001$ ),  
223 concern with media reports related to the epidemic ( $r=0.192$ ,  $p<0.001$ ), and  
224 perceived changes over living situations ( $r=0.571$ ,  $p<0.001$ ), emotional  
225 control ( $r=0.752$ ,  $p<0.001$ ) and epidemic-related dreams ( $r=0.708$ ,  $p<0.001$ ).  
226 Psychological distress was significantly negatively correlated with age  
227 ( $r=-0.371$ ,  $p<0.001$ ), marriage ( $r=-0.301$ ,  $p<0.001$ ) and coping styles ( $r=-0.573$ ,  
228  $p<0.001$ ); there was no significant correlation with gender. The coping style  
229 was significantly positively correlated with age and marriage, and  
230 significantly negatively correlated with other category variables. All  
231 epidemic contact characteristics and concern with media reports related to  
232 the epidemic were significantly positively correlated with perceived impacts  
233 of the epidemic (Table 4).

234 **Table4 Correlations of demographic, epidemic contact and concern characteristics, perceived epidemic impacts, coping style and psychological distress in all participants(n=1599) (Spearman's**  
 235 **rank correlation)**

|                                                           | Gender    | Age       | Marriage  | History of visiting Wuhan | History of epidemics occurring in the community | Concern with media reports related to the epidemic | Changes over living situations | Emotional control | Epidemic-related dreams | Coping style | Psychological distress |
|-----------------------------------------------------------|-----------|-----------|-----------|---------------------------|-------------------------------------------------|----------------------------------------------------|--------------------------------|-------------------|-------------------------|--------------|------------------------|
| <b>Demographic characteristics</b>                        |           |           |           |                           |                                                 |                                                    |                                |                   |                         |              |                        |
| Gender                                                    | 1         |           |           |                           |                                                 |                                                    |                                |                   |                         |              |                        |
| Age                                                       | -0.032    | 1         |           |                           |                                                 |                                                    |                                |                   |                         |              |                        |
| Marriage                                                  | -0.061*   | 0.768***  | 1         |                           |                                                 |                                                    |                                |                   |                         |              |                        |
| <b>Epidemic contact characteristics</b>                   |           |           |           |                           |                                                 |                                                    |                                |                   |                         |              |                        |
| History of visiting Wuhan                                 | 0.039     | -0.477*** | -0.420*** | 1                         |                                                 |                                                    |                                |                   |                         |              |                        |
| History of epidemics occurring in the community           | 0.031     | -0.236*** | -0.214*** | 0.257***                  | 1                                               |                                                    |                                |                   |                         |              |                        |
| <b>Concern with media reports related to the epidemic</b> | -0.004    | 0.017     | 0.006     | 0.130***                  | 0.052*                                          | 1                                                  |                                |                   |                         |              |                        |
| <b>Perceived impacts of the epidemic</b>                  |           |           |           |                           |                                                 |                                                    |                                |                   |                         |              |                        |
| Changes over living situations                            | -0.103*** | -0.212*** | -0.125*** | 0.321***                  | 0.142***                                        | 0.229***                                           | 1                              |                   |                         |              |                        |
| Emotional control                                         | -0.020    | -0.411*** | -0.320*** | 0.586***                  | 0.219***                                        | 0.155***                                           | 0.506***                       | 1                 |                         |              |                        |
| Epidemic-related dreams                                   | -0.023    | -0.378*** | -0.296*** | 0.646***                  | 0.215***                                        | 0.199***                                           | 0.462***                       | 0.714***          | 1                       |              |                        |
| <b>Coping style</b>                                       | -0.065**  | 0.389***  | 0.317***  | -0.525***                 | -0.189***                                       | -0.088***                                          | -0.316***                      | -0.577***         | -0.563***               | 1            |                        |
| <b>Psychological distress</b>                             | 0.000     | -0.371*** | -0.301*** | 0.548***                  | 0.219***                                        | 0.192***                                           | 0.571***                       | 0.752***          | 0.708***                | -0.573***    | 1                      |

236 Note: \*\*\*  $p < 0.001$ , \*\*  $p < 0.01$ , and \*  $p < 0.05$ .

237

238 **Discussion**

239 The results of the study suggest that the general population with a history of  
240 visiting Wuhan, those with a history of epidemics occurring in their  
241 community, and those who perceived more severe impacts of the epidemic of  
242 COVID-19 on their living situations, emotional control, and epidemic-related  
243 dreams have a higher level of psychological distress than those with none or  
244 little of these experiences. These findings are consistent with the findings of  
245 previous studies. The traumatic stress experience during the occurrence of  
246 emergency events, such as major public events or natural disasters, is often  
247 related to the general population's psychological distress and subsequent  
248 mental illness [5,6,8].

249 Furthermore, the study found that there were more participants who  
250 exhibited a negative coping style (34.2%), especially among younger, single,  
251 those with a history of epidemic contact, and those who perceived severe  
252 impacts of the epidemic of COVID-19.

253 Other studies related to traumatic stress events have reported that those in  
254 the general population with traumatic stress experiences were more likely to  
255 adopt a negative coping style [9]. Some studies have shown that this  
256 phenomenon is related to the general population's brain functional  
257 connectivity [15], while others have shown that it is related to social support  
258 [20,21]. The underlying mechanism of this association has yet to be  
259 elucidated, which may be the result of the combined effect of the two

260 mechanisms. Further study is needed to confirm this hypothesis. More  
261 importantly, the study also found that the general population with negative  
262 coping styles has higher psychological distress than those with positive  
263 coping styles. Many previous studies have shown that different coping styles,  
264 especially negative coping styles, for trauma stress events are usually related  
265 to subsequent mental illness [7,10,22]. Therefore, this part of the general  
266 population with a negative coping style should be given attention and  
267 follow-up, and appropriate interventions should be given if necessary.

268 Finally, this study included concern with media reports related to the  
269 epidemic of COVID-19 in the analysis. Previous studies have reported that  
270 post-disaster mental health problems, such as post-traumatic stress disorder  
271 (PTSD), may be related to media reports in addition to direct exposure to the  
272 disaster environment [23,24]. The study found that with increasing concern  
273 with media reports related to epidemic, the general population's  
274 psychological distress level has also increased accordingly; this study also  
275 found that the general population's coping style was negatively related to  
276 concern with media reports. This result suggested that during the epidemic of  
277 COVID-19, the degree of concern with media reports affected the general  
278 population's psychological distress level and coping style, which might be  
279 related to that media reports could affect the general population's perceptions  
280 of the disease and what preventive measures they would take [25,26]; further  
281 research is needed to confirm this relation.

282 In conclusion, this study found that the epidemic of COVID-19 caused  
283 different levels of psychological distress. Those with epidemic contact  
284 characteristics, excessive concern with media reports, and those who  
285 perceived more impacts of the epidemic reported higher levels of  
286 psychological distress. The psychological distress was significantly different  
287 in general population and was significantly negatively correlated with coping  
288 style. Therefore, appropriate interventions should be implemented early to  
289 address the impacts of such epidemics, especially for those in the general  
290 population with a high level of psychological distress and/or with a negative  
291 coping style.

## 292 **Limitations**

293 There are several limitations in our study. First, the survey method is based  
294 on network invitation rather than face-to-face random sampling, and  
295 participants need to be able to use network tools. As a result, the status of the  
296 general population who cannot use network tools is unclear. Second, we did  
297 not assess whether and how respondents were engaging in prevention.  
298 Finally, our study design is cross-sectional and thus cannot capture changes  
299 in psychological distress and its predictors over the course of the COVID-19.

300

## 301 **Acknowledgments**

302 We thank the general population who participated in this survey and bravely  
303 resisted the COVID-19 epidemic, and thank the Questionnaire Star

304 (<https://www.wjx.cn>) for providing us with a data survey platform.

305

### 306 **Author Contributions**

307 **Data curation:** Zhen-zhen Xiong, Wei-yi Xiang, Zhe Li.

308 **Formal analysis:** Hui-yao Wang, Qian Xia.

309 **Investigation:** Zhen-zhen Xiong, Zhi-xiong Li, Wei-yi Xiang, Yi-wen Yuan.

310 **Validation:** Zhi-xiong Li, Ya-ya Liu, Yi-wen Yuan.

311 **Writing – original draft:** Hui-yao Wang, Qian Xia.

312 **Writing – review & editing:** Zhe Li.

313

314

### 315 **References**

316 1. Kang Jia, Facts about the novel coronavirus: Transmission. ChinaDaily. 2020 Feb 06 [Cited 2020

317 Mar 16]. Available from:

318 <https://www.chinadaily.com.cn/a/202002/06/WS5e3bd7a2a31012821727588f.html>.

319 2. Zhang Yangfei, Hubei province steps up epidemic prevention, control efforts. ChinaDaily. 2020

320 Feb 16 [Cited 2020 Mar 16]. Available from:

321 <https://www.chinadaily.com.cn/a/202002/16/WS5e491ffea310128217277dcf.html>.

322 3. Xiang Y-T, Yang Y, Li W, et al. Timely mental health care for the 2019 novel coronavirus

323 outbreak is urgently needed. The Lancet Psychiatry. 2020. doi: 10.1016/S2215-0366(20)30046-8.

324 4. Kang L, Li Y, Hu S, et al. The mental health of medical workers in Wuhan, China dealing with the

325 2019 novel coronavirus. The Lancet Psychiatry.2020. doi:10.1016/S2215-0366(20)30047-X.

- 326 5. Li L I, Wan C, Ding R, et al. Mental distress among Liberian medical staff working at the China  
327 Ebola Treatment Unit: A cross sectional study. *Health and Quality of Life Outcomes*. 2015; 13(1).  
328 doi: 10.1186/s12955-015-0341-2.
- 329 6. Lau J T F, Tsui H Y, Kim J H, Chan P K S, Griffiths S. Monitoring of perceptions, anticipated  
330 behavioral, and psychological responses related to H5N1 influenza. *Infection*. 2010;  
331 38(4):275-283. doi: 10.1007/s15010-010-0034-z.
- 332 7. Hollifield M, Hewage C, Gunawardena C N, Kodituwakku P, Bopagoda K, Weerathnege K.  
333 Symptoms and coping in Sri Lanka 20–21 months after the 2004 tsunami. *British Journal of*  
334 *Psychiatry*. 2008; 192(01):39-44. doi: 10.1192/bjp.bp.107.038422.
- 335 8. Huang J, Liu Q, Li J, et al. Post-traumatic stress disorder status in a rescue group after the  
336 Wenchuan earthquake relief. *Neural Regeneration Research*. 2013; 8(20):1898-1906. doi:  
337 10.3969/j.issn.1673-5374.2013.20.009.
- 338 9. Scheenen M E, Spikman J M, De Koning M E, et al. Patients “At Risk” of Suffering from  
339 Persistent Complaints after Mild Traumatic Brain Injury: The Role of Coping, Mood Disorders,  
340 and Post-Traumatic Stress. *Journal of Neurotrauma*. 2017; 34(1):31-37. doi:  
341 10.1089/neu.2015.4381.
- 342 10. Wang L, Kang C, Yin Z, Su F. Psychological Endurance, Anxiety, and Coping Style among  
343 Journalists Engaged in Emergency Events: Evidence from China. *Iranian journal of public health*.  
344 2019;48(1):95-102. PMID: 30847316.
- 345 11. Wei-Qing Chen, Tze-Wai Wong, Tak-Sun Yu. Direct and Interactive Effects of Occupational  
346 Stress and Coping on Ulcer-Like Symptoms Among Chinese Male off-Shore Oil Workers.  
347 *American Journal of Industrial Medicine*. 2009; 52(6):500-508. doi: 10.1002/ajim.20691.

- 348 12. Sliter M, Kale A, Yuan Z. Is humor the best medicine? The buffering effect of coping humor on  
349 traumatic stressors in firefighters. *Journal of Organizational Behavior*. 2014; 35(2):257-272. doi:  
350 10.1002/job.1868.
- 351 13. Taylor M R, Agho K E, Stevens G J, Raphael B. Factors influencing psychological distress during  
352 a disease epidemic: Data from Australia's first outbreak of equine influenza. *BMC Public Health*.  
353 2008; 8(1):347-0. doi: 10.1186/1471-2458-8-347.
- 354 14. Stallard P, Velleman R, Langsford J, Baldwin S. Coping and psychological distress in children  
355 involved in road traffic accidents. 2001; 40(2):197-208. doi: 10.1348/014466501163643.
- 356 15. Santarnecchi, Emiliano, Sprugnoli, et al. Brain functional connectivity correlates of coping styles.  
357 *Cognitive, affective & behavioral neuroscience*. 2018; 18(3):495-508. doi:  
358 10.3758/s13415-018-0583-7.
- 359 16. Westerhuis W, Zijlmans M, Fischer K, van Andel, J, Leijten, FS. Coping style and quality of life  
360 in patients with epilepsy: a cross-sectional study. *Journal of Neurology*. 2011; 258(1):37-43. doi:  
361 10.1007/s00415-010-5677-2.
- 362 17. Kessler RC, Green JG, Gruber MJ, et al. Screening for serious mental illness in the general  
363 population with the K6 screening scale: results from the WHO World Mental Health (WMH)  
364 survey initiative. *Int J Methods Psychiatr Res*. 2010; 19(Suppl 1):4-22. doi: 10.1002/mpr.310.
- 365 18. Xie, Yaning. Reliability and validity of the Simplified Coping Style Questionnaire. *Chinese*  
366 *Journal of Clinical Psychology*. 1999; 6:114-115. doi: 10.16128/j.cnki.1005-3611.1998.02.018.
- 367 19. Dai Xiaoyang. *ChangYong Xinli PingGu LiangBiao ShouCe* 2nd ed. In Xie Yaning, Dai  
368 Xiaoyang editors. *The Simplified Coping Style Questionnaire*. Beijing: People's Military Medical  
369 Press; 2015. pp. 99-101. (In Chinese)

- 370 20. Huang E R, Jones K D, Bennett R M, Hall GCN, Lyons KS. The role of spousal relationships in  
371 fibromyalgia patients' quality of life. *Psychology, Health & Medicine*. 2018; 23(8):987-995. doi:  
372 10.1080/13548506.2018.1444183.
- 373 21. Grace G D, Schill T. Social support and coping style differences in subjects high and low in  
374 interpersonal trust. *Psychological Reports*. 1986; 59(2):584-586. doi: 10.2466/pr0.1986.59.2.584.
- 375 22. Clarke D, Goosen T. The mediating effects of coping strategies in the relationship between  
376 automatic negative thoughts and depression in a clinical sample of diabetes patients. *Personality  
377 and Individual Differences*. 2009; 46(4):460-464. doi: 10.1016/j.paid.2008.11.014.
- 378 23. Duarte CS, Wu P, Cheung A, Mandell DJ, Fan B, Wicks J, et al. Media use by children and  
379 adolescents from New York City 6 months after the WTC attack. *J Trauma Stress*. 2011;  
380 24(5):553-6. doi: 10.1002/jts.20687
- 381 24. Weems CF, Scott BG, Banks DM, Graham RA. Is TV traumatic for all youths? The role of  
382 preexisting posttraumatic-stress symptoms in the link between disaster coverage and stress.  
383 *Psychol Sci*. 2012; 23(11):1293-7. doi: 10.1177/0956797612446952.
- 384 25. Young ME, Norman GR, Humphreys KR. Medicine in the Popular Press: The Influence of the  
385 Media on Perceptions of Disease. *PLoS ONE*. 2008; 3(10): e3552. doi:  
386 10.1371/journal.pone.0003552.
- 387 26. Ludolph R, Schulz PJ, Chen L. Investigating the Effects of Mass Media Exposure on the Uptake  
388 of Preventive Measures by Hong Kong Residents during the 2015 MERS Outbreak: The  
389 Mediating Role of Interpersonal Communication and the Perception of Concern. *J Health  
390 Commun*. 2018; 23(1):1-8. doi: 10.1080/10810730.2017.1388455.
